# Supplementary material for: Thermodynamics and kinetics of graphene chemistry: a graphene hydrogenation prototype study
Source: Royal Society of Chemistry journal article supplement (doi:10.1039/c6cp05687c), 2016-01-01

# Transition state Cartesian coordinates and imaginary normal mode visualization

*Pyrene e1-ts; Img freq = 1967i*

|   |              |              |              |
|---|--------------|--------------|--------------|
| 6 | -0.715218862 | 0.146558703  | 0.000000000  |
| 6 | 0.678207207  | -0.132573657 | 0.000000000  |
| 6 | -3.498011720 | 0.544249916  | 0.000000000  |
| 6 | 3.491856565  | -0.443491114 | 0.000000000  |
| 6 | -2.812831270 | 0.448364200  | -1.210844081 |
| 6 | -2.812831270 | 0.448364200  | 1.210844081  |
| 6 | 2.766891646  | -0.460268261 | -1.217364427 |
| 6 | 2.766891646  | -0.460268261 | 1.217364427  |
| 6 | -1.431159690 | 0.200826837  | -1.234356352 |
| 6 | -1.431159690 | 0.200826837  | 1.234356352  |
| 6 | 1.391554618  | -0.213267243 | -1.236294075 |
| 6 | 1.391554618  | -0.213267243 | 1.236294075  |
| 6 | 0.648035396  | -0.146915887 | -2.461808667 |
| 6 | 0.648035396  | -0.146915887 | 2.461808667  |
| 6 | -0.696454014 | 0.094947110  | -2.460850722 |
| 6 | -0.696454014 | 0.094947110  | 2.460850722  |
| 1 | -1.242355282 | 0.155402747  | -3.401593880 |
| 1 | -1.242355282 | 0.155402747  | 3.401593880  |
| 1 | 1.189525362  | -0.229652865 | -3.403309284 |
| 1 | 1.189525362  | -0.229652865 | 3.403309284  |
| 1 | -4.570115364 | 0.729003740  | 0.000000000  |
| 1 | 4.139898688  | 1.051120623  | 0.000000000  |
| 1 | -3.356543661 | 0.513813029  | -2.152365698 |
| 1 | -3.356543661 | 0.513813029  | 2.152365698  |
| 1 | 3.305563311  | -0.552084219 | -2.159349457 |
| 1 | 3.305563311  | -0.552084219 | 2.159349457  |
| 1 | 4.503980651  | -0.846559106 | 0.000000000  |

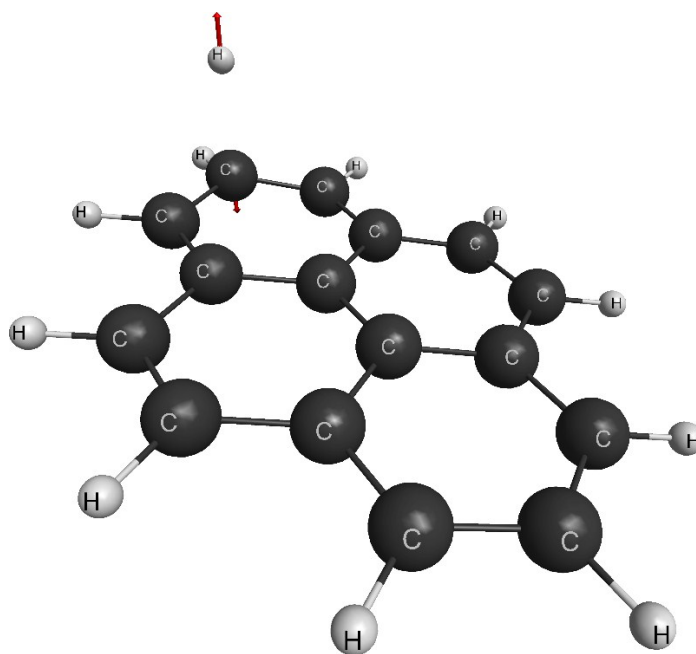

---

Pyrene e2-ts; img freq = 1941i

---

|   |              |              |              |
|---|--------------|--------------|--------------|
| 6 | -4.382179998 | -3.476479998 | -0.009500000 |
| 6 | -2.988469999 | -3.476029998 | -0.031730000 |
| 6 | -2.272049999 | -2.267869999 | 0.005350000  |
| 6 | -2.990749999 | -1.034620000 | -0.028090000 |
| 6 | -4.417929998 | -1.044730000 | 0.025300000  |
| 6 | -5.092129998 | -2.275789999 | -0.010750000 |
| 6 | -0.841460000 | -2.229379999 | -0.027670000 |
| 6 | -2.286209999 | 0.198720000  | 0.046010000  |
| 6 | -0.863420000 | 0.206250000  | 0.003290000  |
| 6 | -0.165880000 | -1.039620000 | 0.009270000  |
| 6 | -0.175460000 | 1.447689999  | 0.114590000  |
| 1 | 0.893480000  | 1.454209999  | -0.098350000 |
| 6 | -0.904580000 | 2.651739999  | -0.037350000 |
| 6 | -2.290059999 | 2.643059999  | -0.029160000 |
| 6 | -3.007109999 | 1.431269999  | -0.008180000 |
| 6 | -4.436769998 | 1.394309999  | 0.019200000  |
| 6 | -5.115019998 | 0.206640000  | 0.004090000  |
| 1 | -6.204079997 | 0.197270000  | 0.023870000  |
| 1 | -4.983079998 | 2.336579999  | 0.000390000  |
| 1 | -0.293570000 | -3.170839999 | -0.027170000 |
| 1 | -4.921349998 | -4.421129998 | -0.030910000 |
| 1 | -2.441539999 | -4.417899998 | -0.029430000 |
| 1 | -6.181109997 | -2.285509999 | 0.007460000  |
| 1 | 0.923360000  | -1.028600000 | -0.000960000 |
| 1 | -0.367780000 | 3.597369998  | -0.064760000 |
| 1 | -2.840929999 | 3.579989998  | -0.100870000 |
| 1 | 0.206430000  | 1.484919999  | 1.754359999  |

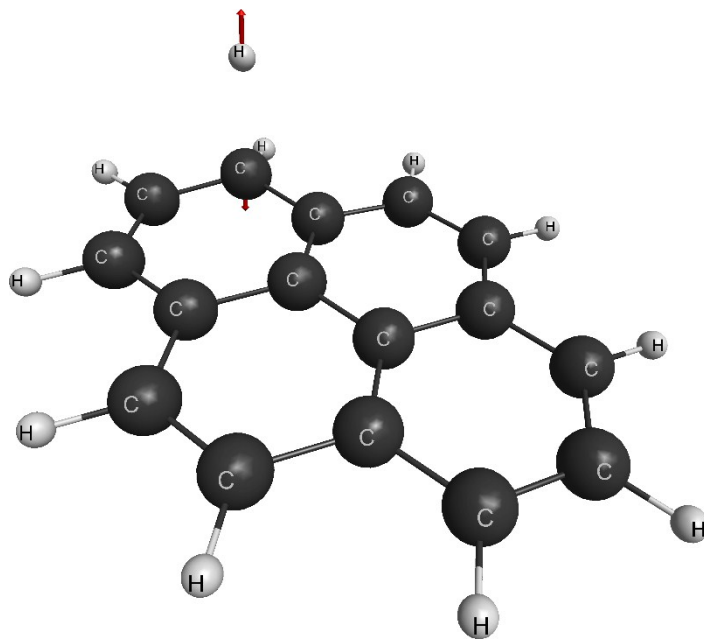

---

Pyrene e3-ts; img freq = 1997

---

|   |              |              |              |
|---|--------------|--------------|--------------|
| 6 | 0.718421752  | -0.017659971 | -0.022321172 |
| 6 | -0.705205685 | -0.018572275 | 0.043472709  |
| 6 | 3.527295879  | -0.010564848 | -0.062443380 |
| 6 | -3.515468959 | -0.015453983 | -0.022130659 |
| 6 | 2.835726917  | 1.197576905  | -0.047079956 |
| 6 | -2.824366773 | 1.192413548  | 0.040454918  |
| 6 | 2.834702392  | -1.223899930 | -0.053514923 |
| 6 | -2.824309670 | -1.227538956 | -0.045213836 |
| 6 | 1.431927002  | 1.217905808  | 0.021004670  |
| 6 | -1.418822259 | 1.215759471  | 0.018432743  |
| 6 | 1.436882163  | -1.246422048 | -0.005128339 |
| 6 | -1.420931766 | -1.251667613 | -0.044755625 |
| 6 | -0.677759242 | 2.440990128  | 0.070491533  |
| 6 | 0.688334062  | 2.442475982  | 0.023587921  |
| 6 | -0.683487110 | -2.475334694 | -0.095865091 |
| 6 | 0.692900642  | -2.492266188 | 0.065857098  |
| 1 | 1.234771185  | -3.412166274 | -0.152707469 |
| 1 | -1.231270916 | -3.414504827 | -0.158856691 |
| 1 | 1.236007659  | 3.383776053  | 0.048263299  |
| 1 | -1.226541877 | 3.381908697  | 0.076659457  |
| 1 | 4.614184147  | -0.010722933 | -0.107496253 |
| 1 | -4.603320838 | -0.015794175 | -0.016667416 |
| 1 | 3.381437663  | 2.140080264  | -0.037608750 |
| 1 | -3.370623564 | 2.134607745  | 0.047916307  |
| 1 | 3.383875243  | -2.164471867 | -0.044264985 |
| 1 | -3.371713637 | -2.167538035 | -0.099725096 |
| 1 | 0.887088938  | -2.833855432 | 1.723241239  |

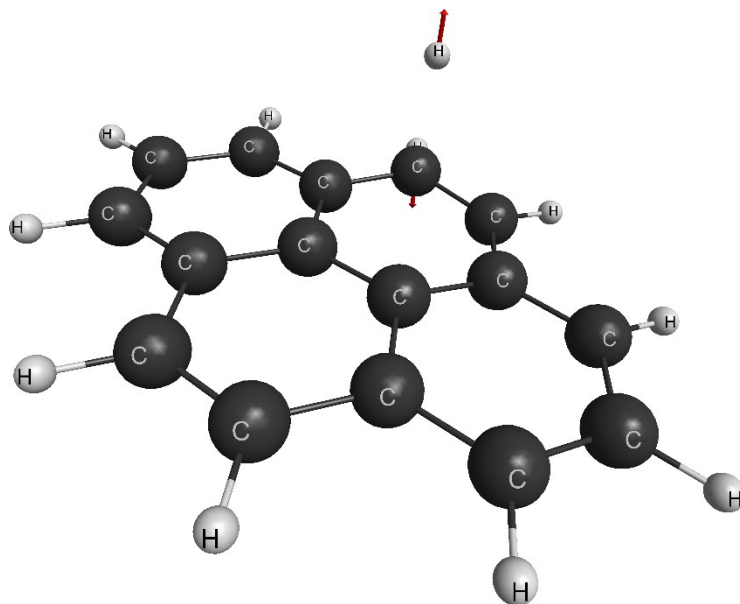

---

Pyrene i1-ts; img freq = 2235i

---

|   |              |              |              |
|---|--------------|--------------|--------------|
| 6 | 0.704380000  | 0.006470000  | 0.073970000  |
| 6 | -0.714290000 | 0.004280000  | 0.088230000  |
| 6 | 3.516779998  | -0.006850000 | -0.029550000 |
| 6 | -3.522569998 | 0.003700000  | -0.020340000 |
| 6 | 2.827169999  | 1.205659999  | 0.012780000  |
| 6 | -2.834579999 | 1.213449999  | -0.001840000 |
| 6 | 2.833169999  | -1.215359999 | 0.023400000  |
| 6 | -2.828169999 | -1.208889999 | 0.010440000  |
| 6 | 1.419519999  | 1.233569999  | 0.064250000  |
| 6 | -1.428359999 | 1.238239999  | 0.001820000  |
| 6 | 1.426169999  | -1.237589999 | 0.260600000  |
| 6 | -1.428189999 | -1.231349999 | 0.024540000  |
| 6 | -0.686690000 | 2.461939999  | 0.020500000  |
| 6 | 0.681350000  | 2.459419999  | 0.006450000  |
| 6 | -0.683900000 | -2.463369999 | 0.012000000  |
| 6 | 0.673850000  | -2.471489999 | 0.073350000  |
| 1 | 1.225519999  | -3.410169998 | 0.061270000  |
| 1 | -1.232119999 | -3.397779998 | -0.102250000 |
| 1 | 1.231169999  | 3.399779998  | 0.001350000  |
| 1 | -1.232809999 | 3.403759998  | -0.016770000 |
| 1 | 4.598799998  | -0.004840000 | -0.143460000 |
| 1 | -4.610359998 | 0.001200000  | -0.032470000 |
| 1 | 3.374699998  | 2.146529999  | -0.015070000 |
| 1 | -3.381689998 | 2.154389999  | -0.042410000 |
| 1 | 3.374759998  | -2.159469999 | 0.000970000  |
| 1 | -3.374929998 | -2.150289999 | -0.023070000 |
| 1 | 1.437539999  | -1.244829999 | 1.846649999  |

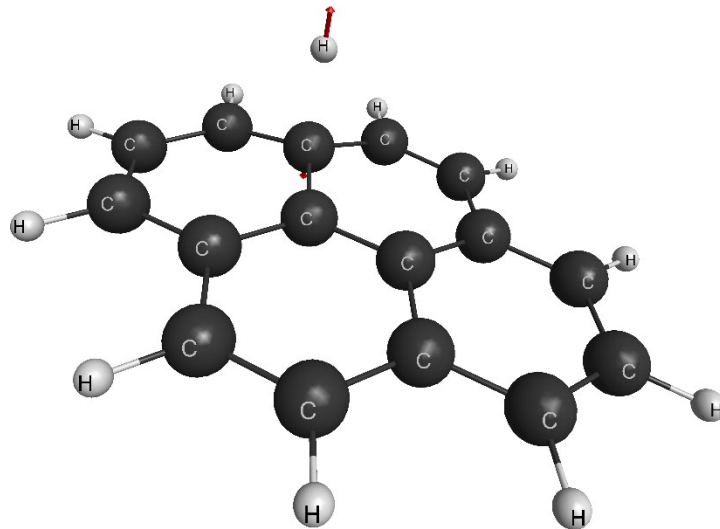

---

Pyrene i2-ts; img freq = 2025

---

|   |              |              |              |
|---|--------------|--------------|--------------|
| 6 | 0.727384788  | -0.178367160 | 0.002630942  |
| 6 | -0.716349415 | -0.104926561 | 0.001393336  |
| 6 | 3.500202580  | 0.320116262  | -0.009022154 |
| 6 | -3.519058961 | -0.199941811 | 0.004205202  |
| 6 | 2.813784594  | 0.222941665  | -1.221163176 |
| 6 | 2.814411450  | 0.276204266  | 1.206567793  |
| 6 | -2.828719175 | -0.193661916 | -1.207401454 |
| 6 | -2.828071192 | -0.140195056 | 1.214001554  |
| 6 | 1.425256769  | 0.056612866  | -1.248146039 |
| 6 | 1.425911276  | 0.111252974  | 1.241528807  |
| 6 | -1.424111191 | -0.180673356 | -1.229734901 |
| 6 | -1.423473818 | -0.126377348 | 1.235032803  |
| 6 | -0.681676407 | -0.146946850 | -2.457953397 |
| 6 | -0.680413908 | -0.038755852 | 2.460189753  |
| 6 | 0.680926305  | -0.028148999 | -2.464246402 |
| 6 | 0.682205450  | 0.080018988  | 2.460547305  |
| 1 | 1.218235417  | 0.042006305  | -3.409408795 |
| 1 | 1.220006294  | 0.191548169  | 3.401443962  |
| 1 | -1.229400360 | -0.206866582 | -3.397601025 |
| 1 | -1.227668574 | -0.057288036 | 3.401858920  |
| 1 | 4.579639595  | 0.454886419  | -0.012256173 |
| 1 | -4.606824208 | -0.215980817 | 0.004829417  |
| 1 | 3.354045983  | 0.324322664  | -2.161642746 |
| 1 | 3.355141429  | 0.418755256  | 2.141413996  |
| 1 | -3.375438097 | -0.236322481 | -2.148458090 |
| 1 | -3.374273043 | -0.141166781 | 2.156301401  |
| 1 | 0.866046414  | -1.745126286 | 0.036909418  |

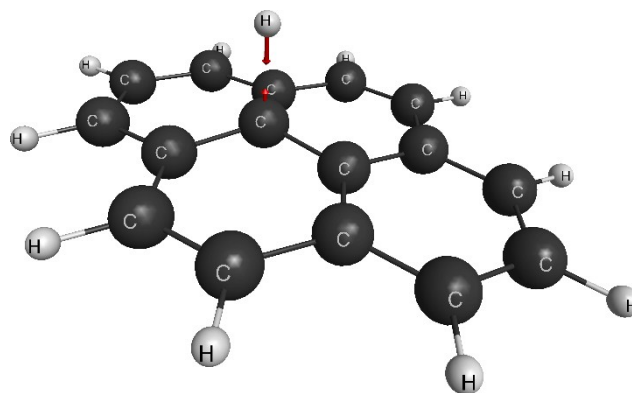

---

Coronene e-ts; img freq = 1967i

---

|   |              |              |              |
|---|--------------|--------------|--------------|
| 6 | -0.095116424 | -1.087925392 | 0.476563366  |
| 6 | 1.238348490  | -1.578224621 | 0.532389474  |
| 6 | 2.309251887  | -0.688596000 | 0.238210124  |
| 6 | 2.044038394  | 0.693261318  | 0.017989520  |
| 6 | 0.698103557  | 1.150951421  | -0.063414562 |
| 6 | -0.354205126 | 0.238766922  | 0.221703572  |
| 6 | 3.653971038  | -1.152875638 | 0.296735508  |
| 6 | 3.114703094  | 1.583923894  | -0.271711508 |
| 6 | 4.463676050  | 1.120722883  | -0.206518515 |
| 6 | 4.725398817  | -0.264199498 | -0.003024199 |
| 6 | 5.535183903  | 2.007490102  | -0.479108657 |
| 6 | 5.251188903  | 3.412233239  | -0.641080696 |
| 6 | 3.929372575  | 3.827666656  | -0.809268890 |
| 6 | 2.846510094  | 2.957977571  | -0.526229580 |
| 6 | 1.494498459  | 3.389221919  | -0.597447774 |
| 6 | 0.457018686  | 2.523967624  | -0.332320155 |
| 1 | -0.572538518 | 2.877125088  | -0.379113820 |
| 1 | 1.289421303  | 4.437991737  | -0.809060090 |
| 1 | -0.915237048 | -1.773262133 | 0.687770608  |
| 1 | -1.382750682 | 0.595651861  | 0.181340643  |
| 1 | 5.637604076  | 3.969483117  | 0.892060348  |
| 1 | 3.720371912  | 4.870674211  | -1.043612281 |
| 6 | 1.530717541  | -2.948435910 | 0.765192647  |
| 6 | 2.829631637  | -3.404189791 | 0.789511303  |
| 6 | 3.917440268  | -2.534919377 | 0.510251367  |
| 1 | 0.708983683  | -3.632170390 | 0.975404951  |
| 1 | 3.033978980  | -4.458457260 | 0.973023464  |
| 6 | 5.267850096  | -2.979558748 | 0.536684687  |
| 6 | 6.305562989  | -2.116061793 | 0.274639080  |
| 6 | 6.069125261  | -0.732388063 | 0.045401543  |
| 1 | 5.468825415  | -4.035063533 | 0.716743391  |
| 1 | 7.333589701  | -2.476095694 | 0.294239635  |
| 6 | 6.862124874  | 1.515640781  | -0.446951514 |
| 1 | 7.683774067  | 2.205040626  | -0.637935824 |
| 6 | 7.120292764  | 0.178510664  | -0.232044762 |
| 1 | 8.147866789  | -0.182974434 | -0.216800279 |
| 1 | 6.048662497  | 4.042216642  | -1.035992126 |

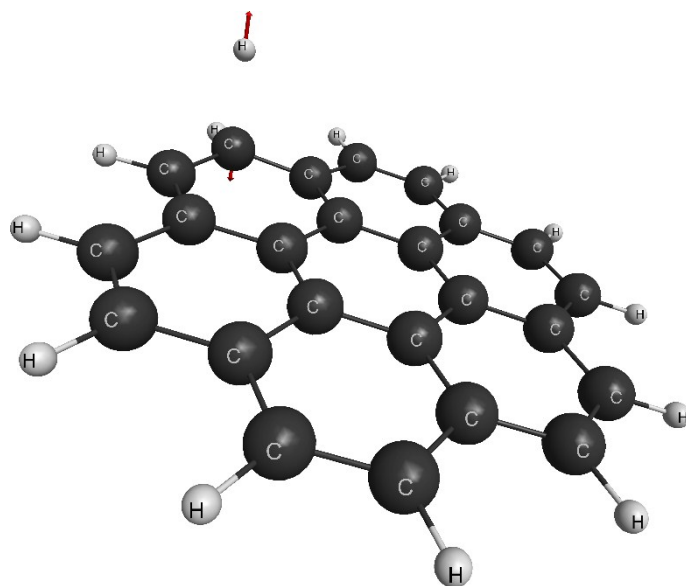

---

Coronene i1-ts; img freq = 2229i

---

|   |              |              |              |
|---|--------------|--------------|--------------|
| 6 | -3.512407343 | 0.439874340  | -1.244491670 |
| 6 | -3.512407343 | 0.439874340  | 1.244491670  |
| 6 | -2.829338818 | 0.380041291  | 0.000000000  |
| 6 | -1.423530569 | 0.157229227  | 0.000000000  |
| 6 | -0.710605350 | 0.125754185  | -1.231753713 |
| 6 | -0.710605350 | 0.125754185  | 1.231753713  |
| 6 | -1.419856322 | 0.178147641  | -2.464719994 |
| 6 | -1.419856322 | 0.178147641  | 2.464719994  |
| 6 | -2.826408264 | 0.379696468  | -2.436224553 |
| 6 | -2.826408264 | 0.379696468  | 2.436224553  |
| 6 | 0.694385878  | -0.107841926 | -1.231194168 |
| 6 | 0.694385878  | -0.107841926 | 1.231194168  |
| 6 | 1.397082728  | -0.187346672 | 0.000000000  |
| 6 | 2.798716440  | -0.534625001 | 0.000000000  |
| 6 | 3.507289058  | -0.397244473 | -1.252807079 |
| 6 | 3.507289058  | -0.397244473 | 1.252807079  |
| 6 | 2.829033312  | -0.257860589 | -2.433132129 |
| 6 | 2.829033312  | -0.257860589 | 2.433132129  |
| 6 | 1.409336477  | -0.122288343 | -2.461766930 |
| 6 | 1.409336477  | -0.122288343 | 2.461766930  |
| 6 | 0.682612456  | -0.036072929 | -3.676838565 |
| 6 | 0.682612456  | -0.036072929 | 3.676838565  |
| 6 | -0.684387129 | 0.135354254  | -3.679005425 |
| 6 | -0.684387129 | 0.135354254  | 3.679005425  |
| 1 | -1.224801925 | 0.195279020  | -4.623009772 |
| 1 | -1.224801925 | 0.195279020  | 4.623009772  |
| 1 | 1.229229100  | -0.062134660 | -4.618916710 |
| 1 | 1.229229100  | -0.062134660 | 4.618916710  |
| 1 | -4.591401764 | 0.590413302  | -1.244009323 |
| 1 | -4.591401764 | 0.590413302  | 1.244009323  |
| 1 | -3.367580458 | 0.435284340  | -3.380090652 |
| 1 | -3.367580458 | 0.435284340  | 3.380090652  |
| 1 | 4.591078139  | -0.503526846 | -1.246781154 |
| 1 | 4.591078139  | -0.503526846 | 1.246781154  |
| 1 | 3.377387058  | -0.199017151 | -3.372742300 |
| 1 | 3.377387058  | -0.199017151 | 3.372742300  |
| 1 | 2.657714373  | -2.108172110 | 0.000000000  |

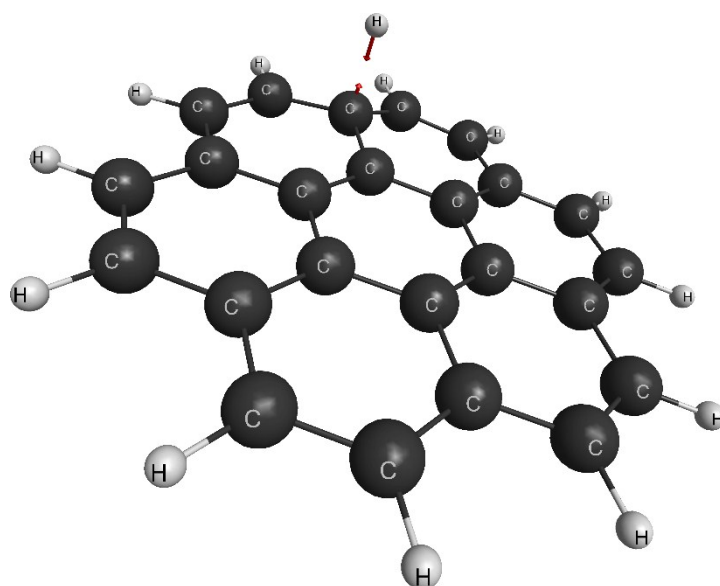

---

Coronene i2-ts; img freq = 2325i

---

|   |              |              |              |
|---|--------------|--------------|--------------|
| 6 | 0.697882216  | -0.040588288 | 3.682040696  |
| 6 | 0.697882216  | -0.040588288 | -3.682040696 |
| 6 | 3.536393263  | 0.052145295  | 1.243702689  |
| 6 | 3.536393263  | 0.052145295  | -1.243702689 |
| 6 | 2.850582950  | 0.034252172  | 2.436388855  |
| 6 | 2.850582950  | 0.034252172  | -2.436388855 |
| 6 | -0.677880648 | -0.095508608 | 3.682088238  |
| 6 | -0.677880648 | -0.095508608 | -3.682088238 |
| 6 | -3.523317952 | -0.188286611 | 1.244172059  |
| 6 | -3.523317952 | -0.188286611 | -1.244172059 |
| 6 | -2.833816070 | -0.134134792 | 2.435357375  |
| 6 | -2.833816070 | -0.134134792 | -2.435357375 |
| 6 | 1.431072306  | -0.025344426 | 2.465826258  |
| 6 | 1.431072306  | -0.025344426 | -2.465826258 |
| 6 | 2.848384544  | 0.086808008  | 0.000000000  |
| 6 | -1.412493791 | -0.050580269 | 2.466577408  |
| 6 | -1.412493791 | -0.050580269 | -2.466577408 |
| 6 | -2.848661721 | -0.138209280 | 0.000000000  |
| 6 | 0.716319473  | 0.042828472  | 1.235426477  |
| 6 | 0.716319473  | 0.042828472  | -1.235426477 |
| 6 | 1.427848271  | 0.025969942  | 0.000000000  |
| 6 | -0.700954797 | -0.011897755 | 1.241462496  |
| 6 | -0.700954797 | -0.011897755 | -1.241462496 |
| 6 | -1.428869700 | 0.137173526  | 0.000000000  |
| 1 | 1.244418309  | -0.066156613 | 4.624113524  |
| 1 | 1.244418309  | -0.066156613 | -4.624113524 |
| 1 | 4.625225792  | 0.087359471  | 1.241472733  |
| 1 | 4.625225792  | 0.087359471  | -1.241472733 |
| 1 | 3.396522550  | 0.005129414  | 3.378721116  |
| 1 | 3.396522550  | 0.005129414  | -3.378721116 |
| 1 | -1.222892987 | -0.122612190 | 4.624983510  |
| 1 | -1.222892987 | -0.122612190 | -4.624983510 |
| 1 | -4.606620539 | -0.305194449 | 1.248894040  |
| 1 | -4.606620539 | -0.305194449 | -1.248894040 |
| 1 | -3.376128635 | -0.170603303 | 3.379440618  |
| 1 | -3.376128635 | -0.170603303 | -3.379440618 |
| 1 | -1.527384275 | 1.711232763  | 0.000000000  |

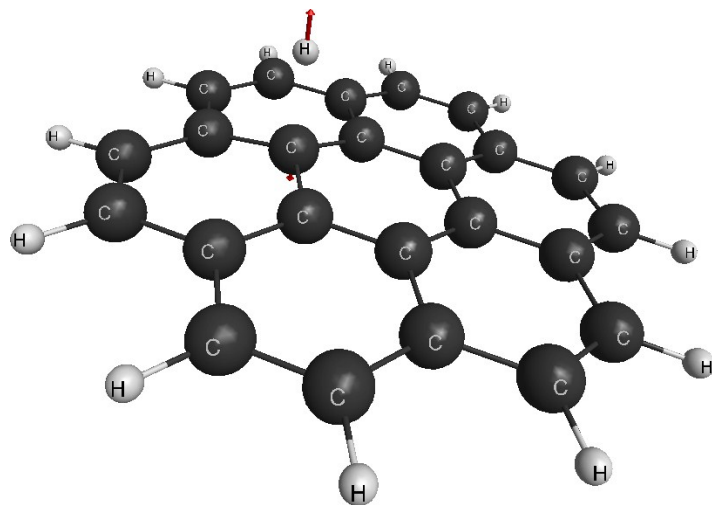

Supplement: c6cp05687c1.pdf [file c6cp05687c1.pdf]
